# Supplementary material
Source: Springer Nature journal article supplement (https://www.springermedizin.de/resource/supplementary/12913_2013_3034_MOESM1_ESM.pdf/9533360)
Supplement: MOESM1 [file 9533360]

# 1- First contact

# 2-Transportation

# 3-Admission

# 5-PRM

# 6-Home care & Institutions

15

SAMU

18

Ambulance

GP

Fire  
brigade

Personal

Own  
means

## Hospital

ED

Radiology

NVU

- NV ICU
- Non ICU NVU

Other Medical Units

## Hospitalisation

Neurology

Geriatrics

Other units

Home

Home care

Home care &  
Social services

Specialized home  
care

Long term care  
units

Medico-social  
structures

Social Services

Specialized  
medical follow-up

Return to work

## Context

Local environment  
(urban, rural, etc)

Personal (isolation, age,  
etc)

## 4-Hospitalisation\*

STHU

NVU

- NV ICU
- Non ICU NVU

Other Medical Units

## Day care

Neurology

Geriatrics

Other units
